# Supplementary material for: Electromyographic comparison of the barbell deadlift using constant versus variable resistance in healthy, trained men
Source: PLoS One. 2019 Jan 22;14(1):e0211021. doi: 10.1371/journal.pone.0211021 (PMC6342300; doi:10.1371/journal.pone.0211021)
Supplement: S1 File — EMG data. (XLSX) [file pone.0211021.s001.xlsx]

## Sheet: Sheet1
Subject	Phases	Modality	Time	Height	gluteus	semi	bifem	erector	vaslat
1	1	1	0.7	188	0.297	0.584	0.494	0.337
2	1	1	0.91	192	0.243	0.232	0.185	0.416	0.481		Modality:		Phases
3	1	1	0.72	183	0.276	0.776	0.336	0.343	0.356		1= FW		1=lower ascending
4	1	1	0.78	183	0.449	0.498	0.335	0.58	0.557		2= FW-2EB		2= middle ascending
5	1	1	0.61	187	0.215	0.41	0.44	0.355	0.234		3= FW-4EB		3= upper ascending
6	1	1	0.9	169	0.316	0.304	0.273	0.285	0.525				4= upper descending
7	1	1	1.32	184	0.125	0.343	0.286	0.393	0.277				5= middle descending
8	1	1	0.56	173	0.154	0.315	0.255	0.18	0.21				6= lower descending
9	1	1	0.7	184	0.422	0.434	0.365	0.393	0.448
10	1	1	0.79	184	0.451	0.516	0.502	0.636	0.317
11	1	1	0.69	184	0.555	0.737	0.582	0.413	0.472
12	1	1	0.57	171	0.36	0.584	0.46	0.281	0.517
13	1	1	0.78	179	0.394	0.629	0.381	0.246	0.296
14	1	1	1.08	182	0.239	0.554	0.29	0.497	0.62		Whole movement
15	1	1	0.84	183	0.396	0.562	0.42	0.483	0.388
1	2	1	0.38	188	0.337	0.728	0.671	0.358				Gluteus				Semitendinosus				Biceps femoris				Erector spinae				Vastus lateralis				Time
2	2	1	0.28	192	0.308	0.264	0.23	0.428	0.133		Subject	FW	FW-2EB	FW-4EB		FW	FW-2EB	FW-4EB		FW	FW-2EB	FW-4EB		FW	FW-2EB	FW-4EB		FW	FW-2EB	FW-4EB		FW	FW-2EB	FW-4EB
3	2	1	0.42	183	0.288	0.843	0.412	0.363	0.258
4	2	1	0.23	183	0.65	0.772	0.416	0.422	0.251		1	0.204	0.196	0.23		0.51	0.463	0.552		0.391	0.317	0.405		0.515	0.316	0.353		0.221				10.17	9.23	9.59
5	2	1	0.38	187	0.217	0.514	0.466	0.405	0.187		2	0.184	0.176	0.204		0.17	0.166	0.212		0.141	0.155	0.226		0.287	0.283	0.639		0.263		0.219		9.69	10.74	11.72
6	2	1	0.33	169	0.405	0.301	0.412	0.286	0.23		3	0.167	0.186	0.214		0.475	0.568	0.665		0.24	0.28	0.32		0.269	0.266	0.337		0.3	0.269	0.359		11.22	10.83	10.95
7	2	1	0.46	184	0.152	0.372	0.339	0.401	0.102		4	0.359	0.343	0.501		0.413	0.395	0.496		0.268	0.295	0.36		0.434	0.395	0.44		0.152	0.297	0.307		8.09	8.38	8.47
8	2	1	0.27	173	0.199	0.311	0.298	0.174	0.119		5	0.17	0.14	0.389		0.296	0.277	0.282		0.262	0.257	0.253		0.232		0.2			0.149	0.145		10.69	9.43	9.09
9	2	1	0.23	184	0.393	0.336	0.418	0.401	0.311		6	0.238	0.219	0.249		0.208	0.192	0.209		0.263	0.25	0.259		0.233	0.239	0.274		0.213				9.36	11.08	12.68
10	2	1	0.35	184	0.608	0.618	0.694	0.644	0.186		7	0.097	0.116	0.11		0.234	0.323	0.293		0.242	0.328	0.295		0.346	0.369	0.339		0.152	0.188	0.287		10.88	11.15	12.56
11	2	1	0.3	184	0.512	0.823	0.659	0.46	0.339		8	0.109	0.077	0.077		0.222	0.201	0.203		0.224	0.197	0.196		0.212	0.18	0.18		0.278				9.05	8.14	8.25
12	2	1	0.25	171	0.455	0.364	0.55	0.28	0.287		9	0.253	0.257	0.257		0.258	0.254	0.254		0.242	0.278	0.278		0.337	0.402	0.402		0.288	0.279	0.279		9.53	8.57	8.57
13	2	1	0.34	179	0.546	1.069	0.543	0.261	0.184		10	0.337	0.372	0.339		0.399	0.407	0.347		0.431	0.468	0.43		0.451	0.416	0.37		0.291	0.33	0.314		10.13	10.17	9.29
14	2	1	0.46	182	0.218	0.842	0.263	0.488	0.286		11	0.292	0.282	0.3		0.409	0.357	0.368		0.397	0.366	0.368		0.418	0.365	0.367		0.295	0.288	0.301		12.33	11.04	10.53
15	2	1	0.32	183	0.419	0.657	0.591	0.518	0.148		12	0.26	0.247	0.267		0.317	0.322	0.349		0.357	0.348	0.347		0.24	0.22	0.247		0.204	0.325	0.323		9.29	9.49	9.33
1	3	1	1.18	188	0.227	0.606	0.514	0.251			13	0.269	0.266	0.277		0.491	0.485	0.443		0.281	0.283	0.287		0.223	0.235	0.212		0.366	0.181	0.183		9.98	13.57	12.94
2	3	1	0.62	192	0.239	0.15	0.187	0.311	0.153		14	0.215	0.228	0.231		0.376	0.373	0.361		0.26	0.283	0.266		0.38	0.347	0.435		0.266	0.329	0.359		11.42	14.43	11.29
3	3	1	0.39	183	0.26	0.659	0.391	0.344	0.217		15	0.269	0.268	0.271		0.346	0.373	0.413		0.288	0.36	0.38		0.401	0.449	0.49			0.226	0.203		10.06	9.69	9.58
4	3	1	0.26	183	0.614	0.534	0.351	0.593	0.23
5	3	1	0.73	187	0.162	0.457	0.278	0.337	0.151
6	3	1	0.35	169	0.323	0.277	0.4	0.321	0.096
7	3	1	0.58	184	0.141	0.251	0.367	0.358	0.148
8	3	1	0.37	173	0.22	0.265	0.32	0.354	0.155
9	3	1	0.4	184	0.338	0.115	0.172	0.481	0.292
10	3	1	0.38	184	0.482	0.623	0.727	0.373	0.202
11	3	1	0.37	184	0.429	0.396	0.537	0.445	0.302
12	3	1	0.29	171	0.451	0.327	0.559	0.397	0.3
13	3	1	0.34	179	0.336	0.411	0.409	0.244	0.167
14	3	1	0.56	182	0.295	0.379	0.377	0.395	0.472
15	3	1	0.44	183	0.377	0.454	0.395	0.467	0.14
1	4	1	1.75	188	0.038	0.39	0.162	0.277
2	4	1	1.62	192	0.118	0.095	0.066	0.179	0.084
3	4	1	1.51	183	0.097	0.29	0.201	0.198	0.108
4	4	1	0.66	183	0.164	0.36	0.256	0.331	0.204
5	4	1	1.21	187	0.09	0.212	0.159	0.112	0.08
6	4	1	0.79	169	0.109	0.115	0.255	0.223	0.807
7	4	1	1.51	184	0.054	0.113	0.2	0.261	0.104
8	4	1	0.86	173	0.076	0.135	0.228	0.201	0.077
9	4	1	1.15	184	0.158	0.285	0.192	0.305	0.161
10	4	1	1.02	184	0.176	0.313	0.265	0.364	0.134
11	4	1	1.56	184	0.104	0.241	0.331	0.343	0.186
12	4	1	1.3	171	0.13	0.215	0.314	0.189	0.143
13	4	1	0.96	179	0.126	0.333	0.177	0.129	0.08
14	4	1	1.62	182	0.039	0.166	0.185	0.306	0.091
15	4	1	0.86	183	0.097	0.285	0.236	0.371	0.108
1	5	1	0.81	188	0.136	0.447	0.313	0.331
2	5	1	0.54	192	0.112	0.191	0.112	0.367	0.123
3	5	1	0.87	183	0.162	0.47	0.207	0.25	0.171
4	5	1	0.63	183	0.108	0.239	0.212	0.412	0.163
5	5	1	0.92	187	0.101	0.205	0.199	0.191	0.113
6	5	1	0.79	169	0.064	0.132	0.25	0.236	0.149
7	5	1	0.76	184	0.073	0.15	0.201	0.34	0.141
8	5	1	0.49	173	0.147	0.202	0.243	0.175	0.106
9	5	1	0.91	184	0.196	0.212	0.265	0.325	0.227
10	5	1	0.43	184	0.088	0.303	0.319	0.353	0.12
11	5	1	1.03	184	0.15	0.316	0.278	0.619	0.166
12	5	1	0.78	171	0.185	0.248	0.281	0.248	0.172
13	5	1	0.69	179	0.159	0.393	0.196	0.194	0.128
14	5	1	0.73	182	0.104	0.224	0.177	0.368	0.174
15	6	1	0.82	183	0.129	0.194	0.187	0.385	0.134
1	6	1	0.5	188	0.171	0.348	0.279	0.282
2	6	1	0.59	192	0.123	0.163	0.084	0.293	0.224
3	6	1	0.93	183	0.161	0.334	0.157	0.268	0.283
4	6	1	0.71	183	0.137	0.227	0.132	0.456	0.25
5	6	1	0.66	187	0.141	0.166	0.194	0.231	0.132
6	6	1	0.52	169	0.081	0.156	0.183	0.244	0.457
7	6	1	1.06	184	0.062	0.157	0.196	0.384	0.234
8	6	1	0.98	173	0.173	0.209	0.213	0.122	0.146
9	6	1	0.52	184	0.247	0.121	0.173	0.29	0.295
10	6	1	0.45	184	0.146	0.283	0.334	0.498	0.413
11	6	1	1.08	184	0.177	0.267	0.168	0.456	0.291
12	6	1	0.68	171	0.197	0.298	0.193	0.224	0.28
13	6	1	0.87	179	0.207	0.248	0.221	0.174	0.172
14	6	1	0.89	182	0.088	0.164	0.185	0.396	0.386
15	6	1	0.92	183	0.092	0.161	0.12	0.348	0.183
1	1	2	0.81	188	0.309	0.458	0.329	0.33
2	1	2	0.82	192	0.218	0.242	0.213	0.344	0.34
3	1	2	0.65	183	0.253	0.847	0.328	0.277	0.356
4	1	2	0.59	183	0.453	0.372	0.306	0.459	0.393
5	1	2	0.68	187	0.193	0.356	0.375	0.407	0.195
6	1	2	0.81	169	0.271	0.261	0.234	0.236	0.55
7	1	2	1.15	184	0.138	0.411	0.423	0.398	0.311
8	1	2	0.53	173	0.118	0.318	0.228	0.149
9	1	2	0.61	184	0.425	0.407	0.441	0.426	0.487
10	1	2	0.92	184	0.438	0.39	0.546	0.614	0.524
11	1	2	0.54	184	0.542	0.713	0.488	0.395	0.554
12	1	2	0.67	171	0.305	0.503	0.349	0.224	0.48
13	1	2	1	179	0.379	0.651	0.351	0.223	0.243
14	1	2	0.91	182	0.258	0.541	0.297	0.377	0.621
15	1	2	0.84	183	0.332	0.443	0.452	0.508	0.377
1	2	2	0.41	188	0.337	0.796	0.542	0.34
2	2	2	0.31	192	0.264	0.275	0.211	0.395	0.11
3	2	2	0.44	183	0.263	0.919	0.363	0.312	0.156
4	2	2	0.28	183	0.513	0.66	0.344	0.5	0.252
5	2	2	0.4	187	0.229	0.421	0.461	0.39	0.17
6	2	2	0.39	169	0.46	0.28	0.413	0.241	0.17
7	2	2	0.65	184	0.187	0.535	0.451	0.422	0.066
8	2	2	0.24	173	0.142	0.328	0.315	0.16
9	2	2	0.22	184	0.315	0.258	0.424	0.433	0.249
10	2	2	0.62	184	0.481	0.502	0.565	0.518	0.189
11	2	2	0.26	184	0.597	0.78	0.701	0.438	0.304
12	2	2	0.27	171	0.451	0.388	0.621	0.283	0.244
13	2	2	0.42	179	0.438	1.151	0.523	0.289	0.156
14	2	2	0.66	182	0.279	0.628	0.274	0.445	0.199
15	2	2	0.37	183	0.325	0.592	0.431	0.508	0.129
1	3	2	0.53	188	0.274	0.582	0.538	0.257
2	3	2	0.58	192	0.237	0.162	0.232	0.359	0.136
3	3	2	0.92	183	0.239	0.706	0.411	0.319	0.198
4	3	2	0.31	183	0.69	0.555	0.391	0.377	0.235
5	3	2	0.68	187	0.177	0.392	0.287	0.307	0.118
6	3	2	0.5	169	0.318	0.264	0.371	0.29
7	3	2	0.54	184	0.176	0.449	0.418	0.431	0.12
8	3	2	0.34	173	0.114	0.161	0.247	0.275
9	3	2	0.51	184	0.376	0.127	0.214	0.584	0.246
10	3	2	0.83	184	0.559	0.595	0.65	0.434	0.213
11	3	2	0.36	184	0.447	0.298	0.5	0.479	0.286
12	3	2	0.51	171	0.417	0.325	0.547	0.311	0.321
13	3	2	0.7	179	0.259	0.341	0.381	0.192	0.131
14	3	2	0.73	182	0.333	0.48	0.418	0.376	0.268
15	3	2	1.01	183	0.342	0.462	0.444	0.498	0.158
1	4	2	1.18	188	0.057	0.396	0.167	0.319
2	4	2	1.69	192	0.123	0.104	0.097	0.201
3	4	2	1.26	183	0.117	0.403	0.268	0.218	0.124
4	4	2	0.74	183	0.194	0.353	0.318	0.302	0.171
5	4	2	0.94	187	0.082	0.188	0.16		0.102
6	4	2	1.77	169	0.06	0.121	0.224	0.241	0.68
7	4	2	1.33	184	0.063	0.184	0.282	0.314	0.084
8	4	2	0.9	173	0.048	0.126	0.19	0.159
9	4	2	1.05	184	0.187	0.146	0.21	0.31	0.151
10	4	2	1.43	184	0.206	0.288	0.274	0.286	0.103
11	4	2	1.64	184	0.117	0.228	0.31	0.367	0.159
12	4	2	1.27	171	0.139	0.202	0.298	0.177	0.178
13	4	2	1.2	179	0.106	0.256	0.183	0.135	0.082
14	4	2	1.83	182	0.043	0.184	0.245	0.249	0.11
15	4	2	0.84	183	0.122	0.274	0.295	0.497	0.112
1	5	2	0.9	188	0.138	0.421	0.242	0.321
2	5	2	0.47	192	0.139	0.159	0.1	0.288
3	5	2	0.8	183	0.169	0.507	0.235	0.302	0.183
4	5	2	0.61	183	0.088	0.288	0.256	0.392	0.209
5	5	2	0.63	187	0.086	0.213	0.237		0.109
6	5	2	0.79	169	0.062	0.119	0.201	0.215
7	5	2	0.51	184	0.06	0.167	0.249	0.349	0.106
8	5	2	0.37	173	0.125	0.193	0.196	0.14
9	5	2	0.72	184	0.228	0.215	0.292	0.343	0.184
10	5	2	0.47	184	0.09	0.368	0.364	0.422	0.114
11	5	2	0.85	184	0.135	0.277	0.18	0.483	0.169
12	5	2	0.69	171	0.2	0.23	0.317	0.214	0.213
13	5	2	0.66	179	0.114	0.409	0.18	0.217	0.152
14	5	2	0.92	182	0.121	0.224	0.183	0.376	0.163
15	6	2	0.54	183	0.137	0.237	0.245	0.449	0.11
1	6	2	0.59	188	0.168	0.334	0.228	0.291
2	6	2	0.41	192	0.143	0.168	0.111	0.308
3	6	2	0.68	183	0.246	0.392	0.189	0.278	0.296
4	6	2	0.72	183	0.103	0.249	0.181	0.452	0.269
5	6	2	0.61	187	0.129	0.159	0.189		0.136
6	6	2	0.42	169	0.075	0.167	0.18	0.214
7	6	2	0.65	184	0.05	0.178	0.256	0.356	0.206
8	6	2	0.66	173	0.148	0.185	0.178	0.113
9	6	2	0.61	184	0.314	0.25	0.263	0.333	0.229
10	6	2	0.75	184	0.102	0.297	0.422	0.39	0.367
11	6	2	1.04	184	0.195	0.157	0.099	0.329	0.33
12	6	2	0.64	171	0.142	0.33	0.196	0.213	0.387
13	6	2	1.3	179	0.188	0.234	0.169	0.123	0.176
14	6	2	1	182	0.086	0.197	0.196	0.374	0.451
15	6	2	1.12	183	0.105	0.124	0.167	0.348	0.199
1	1	3	0.86	188	0.297	0.623	0.444	0.354
2	1	3	0.56	192	0.265	0.308	0.25	0.581	0.319
3	1	3	0.75	183	0.283	0.809	0.389	0.363	0.543
4	1	3	0.62	183	0.487	0.472	0.343	0.51	0.405
5	1	3	0.37	187	0.165	0.372	0.421	0.264	0.168
6	1	3	0.88	169	0.386	0.339	0.284	0.295	0.631
7	1	3	0.96	184	0.134	0.392	0.379	0.432	0.281
8	1	3	0.52	173	0.085	0.262	0.192	0.179	0.197
9	1	3	0.48	184	0.433	0.48	0.435	0.358	0.486
10	1	3	0.65	184	0.433	0.382	0.464	0.4	0.408
11	1	3	0.43	184	0.564	0.702	0.505	0.402	0.628
12	1	3	0.49	171	0.329	0.541	0.429	0.23	0.494
13	1	3	0.84	179	0.439	0.571	0.423	0.213	0.331
14	1	3	0.72	182	0.255	0.575	0.346	0.593	0.595
15	1	3	0.7	183	0.297	0.541	0.418	0.526	0.319
1	2	3	0.45	188	0.351	0.838	0.589	0.354
2	2	3	0.47	192	0.304	0.316	0.296	0.399	0.117
3	2	3	0.49	183	0.231	0.958	0.437	0.426	0.172
4	2	3	0.27	183	0.932	0.668	0.403	0.545	0.297
5	2	3	0.35	187	0.282	0.413	0.4	0.281	0.205
6	2	3	0.46	169	0.458	0.365	0.403	0.279	0.212
7	2	3	0.57	184	0.161	0.455	0.374	0.349	0.101
8	2	3	0.29	173	0.139	0.293	0.224	0.192	0.087
9	2	3	0.26	184	0.418	0.353	0.546	0.36	0.35
10	2	3	0.38	184	0.465	0.485	0.603	0.569	0.214
11	2	3	0.27	184	0.454	0.788	0.763	0.433	0.275
12	2	3	0.23	171	0.486	0.468	0.509	0.291	0.267
13	2	3	0.47	179	0.492	0.944	0.409	0.249	0.17
14	2	3	0.5	182	0.279	0.603	0.261	0.654	0.212
15	2	3	0.41	183	0.378	0.646	0.613	0.59	0.149
1	3	3	1.32	188	0.296	0.68	0.565	0.394
2	3	3	0.58	192	0.266	0.245	0.382	0.537	0.212
3	3	3	0.8	183	0.356	1.031	0.469	0.586	0.256
4	3	3	0.4	183	0.923	0.622	0.518	0.512	0.255
5	3	3	0.47	187	0.196	0.506	0.356	0.384	0.201
6	3	3	0.42	169	0.473	0.343	0.404	0.309
7	3	3	0.68	184	0.167	0.421	0.443	0.345	0.123
8	3	3	0.35	173	0.152	0.19	0.22	0.323	0.118
9	3	3	0.85	184	0.422	0.155	0.25	0.4	0.232
10	3	3	0.75	184	0.516	0.534	0.656	0.383	0.221
11	3	3	0.42	184	0.494	0.311	0.544	0.451	0.313
12	3	3	0.28	171	0.392	0.366	0.514	0.436	0.331
13	3	3	0.38	179	0.39	0.506	0.474	0.252	0.123
14	3	3	0.56	182	0.279	0.507	0.372	0.589	0.214
15	3	3	0.79	183	0.378	0.513	0.527	0.576	0.134
1	4	3	1.22	188	0.055	0.444	0.204	0.371
2	4	3	1.58	192	0.129	0.154	0.15	0.226	0.115
3	4	3	1.42	183	0.142	0.414	0.272	0.275	0.185
4	4	3	0.79	183	0.288	0.465	0.45	0.433	0.196
5	4	3	0.75	187	0.109	0.211	0.173	0.113	0.092
6	4	3	1.2	169	0.09	0.114	0.263	0.239
7	4	3	1.23	184	0.062	0.155	0.251	0.319	0.111
8	4	3	0.49	173	0.063	0.126	0.185	0.201	0.089
9	4	3	0.87	184	0.213	0.203	0.276	0.3	0.143
10	4	3	1.06	184	0.203	0.3	0.315	0.308	0.098
11	4	3	1.26	184	0.116	0.26	0.298	0.366	0.171
12	4	3	0.94	171	0.144	0.223	0.314	0.172	0.147
13	4	3	1.58	179	0.126	0.331	0.241	0.148	0.086
14	4	3	0.81	182	0.088	0.142	0.186	0.335	0.131
15	4	3	0.83	183	0.144	0.328	0.318	0.55	0.117
1	5	3	0.61	188	0.112	0.425	0.249	0.292
2	5	3	0.53	192	0.119	0.247	0.149	0.347	0.12
3	5	3	0.66	183	0.277	0.44	0.187	0.396	0.182
4	5	3	0.63	183	0.079	0.384	0.285	0.437	0.209
5	5	3	0.54	187	0.128	0.227	0.251	0.163	0.095
6	5	3	0.65	169	0.075	0.12	0.21	0.283
7	5	3	0.66	184	0.08	0.174	0.27	0.376	0.17
8	5	3	0.34	173	0.157	0.164	0.161	0.191	0.144
9	5	3	0.6	184	0.192	0.258	0.293	0.342	0.24
10	5	3	0.48	184	0.104	0.267	0.28	0.384	0.231
11	5	3	0.99	184	0.162	0.282	0.217	0.446	0.152
12	5	3	0.65	171	0.195	0.253	0.304	0.252	0.219
13	5	3	0.75	179	0.189	0.38	0.237	0.224	0.14
14	5	3	0.51	182	0.115	0.187	0.167	0.405	0.176
15	5	3	0.5	183	0.132	0.244	0.304	0.486	0.111
1	6	3	0.55	188	0.125	0.351	0.228	0.301
2	6	3	0.43	192	0.083	0.218	0.117	0.284	0.218
3	6	3	0.38	183	0.229	0.239	0.114	0.373	0.305
4	6	3	0.82	183	0.107	0.265	0.201	0.437	0.298
5	6	3	0.58	187	0.158	0.169	0.193	0.166	0.113
6	6	3	0.58	169	0.078	0.151	0.215	0.254
7	6	3	0.71	184	0.04	0.19	0.225	0.365	0.273
8	6	3	1.24	173	0.195	0.142	0.147	0.165	0.131
9	6	3	0.46	184	0.269	0.253	0.223	0.301	0.324
10	6	3	0.48	184	0.109	0.216	0.323	0.392	0.45
11	6	3	0.84	184	0.176	0.154	0.049	0.39	0.339
12	6	3	0.79	171	0.21	0.26	0.262	0.203	0.299
13	6	3	0.89	179	0.214	0.234	0.196	0.177	0.172
14	6	3	0.65	182	0.094	0.162	0.151	0.417	0.311
15	6	3	0.66	183	0.105	0.132	0.177	0.426	0.184
